# Supplementary material for: Identification of differentially expressed genes by means of outlier detection
Source: PubMed Central journal article supplement (PMC6131896; doi:10.1186/s12859-018-2318-8), 2018-09-10

## Additional File 1

Below are Tables 13 – 27 and Figures 8 – 20 related to the results of different scenarios established in the Experimental Setup Section.

### TABLES 13 – 27

**Table 13 Simulation study 1, scenario 2 with  $n_X = n_Y = 30$  and 100 runs. Evaluation of the first step of the ORdensity method using different values of  $\alpha$ . The Table shows the estimated probability,  $\hat{p}_m$ , of no considering as a potential DE gene at least one gene that it really is, and the mean proportion of DE genes (row named “%”) that the procedure considered as potential DE genes.**

| Nb. DE genes |             | $\Delta = 1.5$ |              |              | $\Delta = 2$ |              |              | $\Delta = 3$ |      |      |
|--------------|-------------|----------------|--------------|--------------|--------------|--------------|--------------|--------------|------|------|
|              |             | $\alpha$       |              |              | $\alpha$     |              |              | $\alpha$     |      |      |
|              |             | 0.1            | 0.05         | 0.01         | 0.1          | 0.05         | 0.01         | 0.1          | 0.05 | 0.01 |
| 50           | $\hat{p}_m$ | 0.00           | 0.08         | 0.66         | 0.00         | 0.00         | 0.00         | 0.01         | 0.00 | 0.00 |
|              | %           | 100            | 99.84 (0.55) | 98.00 (2.00) | 100          | 100          | 99.98 (0.20) | 100          | 100  | 100  |
| 100          | $\hat{p}_m$ | 0.06           | 0.26         | 0.98         | 0.00         | 0.00         | 0.02         | 0.00         | 0.00 | 0.00 |
|              | %           | 99.94 (0.24)   | 99.67 (0.65) | 96.37 (2.12) | 100          | 100          | 99.98 (0.14) | 100          | 100  | 100  |
| 200          | $\hat{p}_m$ | 0.47           | 0.95         | 1.00         | 0.01         | 0.03         | 0.79         | 0.00         | 0.00 | 0.00 |
|              | %           | 99.69 (0.37)   | 97.48 (0.90) | 85.24 (2.70) | 99.99 (0.05) | 99.98 (0.09) | 99.27 (0.54) | 100          | 100  | 100  |

**Table 14 Simulation study 1, scenario 3 with  $n_X = n_Y = 30$  and 100 runs. Evaluation of the first step of the ORdensity method using different values of  $\alpha$ . The Table shows the estimated probability,  $\hat{p}_m$ , of no considering as a potential DE gene at least one gene that it really is; the mean proportion of DE genes (row named “%”) that the procedure considered as potential DE genes, and distribution of truly DE genes that are not considered as a potential DE gene in relation with their value of  $\Delta_g$  taken by chance in  $\{1.5, 2, 3\}$ .**

| Number of DE genes |                                                | $\alpha$     |              |                |
|--------------------|------------------------------------------------|--------------|--------------|----------------|
|                    |                                                | 0.1          | 0.05         | 0.01           |
| 50                 | $\hat{p}_m$                                    | 0.01         | 0.03         | 0.30           |
|                    | %                                              | 99.98 (0.20) | 99.94 (0.34) | 99.32 (1.11)   |
|                    | $(\Delta_g = 1.5, \Delta_g = 2, \Delta_g = 3)$ | (100, 0, 0)  | (100, 0, 0)  | (100, 0, 0)    |
| 100                | $\hat{p}_m$                                    | 0.02         | 0.10         | 0.70           |
|                    | %                                              | 99.98 (0.14) | 99.89 (0.35) | 98.91 (1.02)   |
|                    | $(\Delta_g = 1.5, \Delta_g = 2, \Delta_g = 3)$ | (100, 0, 0)  | (100, 0, 0)  | (99.3, 0.7, 0) |
| 200                | $\hat{p}_m$                                    | 0.21         | 0.62         | 1.00           |
|                    | %                                              | 99.87 (0.26) | 99.50 (0.53) | 95.09 (1.50)   |
|                    | $(\Delta_g = 1.5, \Delta_g = 2, \Delta_g = 3)$ | (100, 0, 0)  | (100, 0, 0)  | (96.3, 3.7, 0) |

**Table 15 Simulation study 1, scenario 2 with  $n_X = 30$ ,  $n_Y = 10$  and 100 runs. Evaluation of the first step of the ORdensity method using different values of  $\alpha$ . The Table shows the estimated probability,  $\hat{p}_m$ , of no consider as a potential DE gene at least one gene that it really is, and the mean proportion of DE genes (row named “%”) that the procedure considered as potential DE genes.**

| Nb. DE genes |             | $\Delta = 1.5$ |            |            | $\Delta = 2$ |            |            | $\Delta = 3$ |            |            |
|--------------|-------------|----------------|------------|------------|--------------|------------|------------|--------------|------------|------------|
|              |             | $\alpha$       |            |            | $\alpha$     |            |            | $\alpha$     |            |            |
|              |             | 0.1            | 0.05       | 0.01       | 0.1          | 0.05       | 0.01       | 0.1          | 0.05       | 0.01       |
| 50           | $\hat{p}_m$ | 0.70           | 0.96       | 1          | 0.06         | 0.22       | 0.88       | 0.00         | 0.00       | 0.00       |
|              | %           | 97.6 (2.1)     | 93.5 (3.3) | 74.7 (5.3) | 99.9 (0.5)   | 99.5 (0.9) | 95.6 (3.1) | 100          | 100        | 100        |
| 100          | $\hat{p}_m$ | 0.98           | 1          | 1          | 0.09         | 0.50       | 1          | 0.00         | 0.00       | 0.10       |
|              | %           | 96.5 (1.7)     | 90.9 (2.7) | 66.4 (4.7) | 99.9 (0.4)   | 99.2 (1.0) | 92.4 (3.0) | 100          | 100        | 99.9 (0.3) |
| 200          | $\hat{p}_m$ | 1              | 1          | 1          | 0.88         | 1          | 1          | 0            | 0.02       | 0.80       |
|              | %           | 90.1 (2.0)     | 77.6 (2.6) | 43.4 (3.7) | 98.9 (0.8)   | 95.5 (1.7) | 74.7 (3.9) | 100          | 99.9 (0.1) | 99.0 (0.8) |

**Table 16 Simulation study 1, scenario 3 with  $n_X = 30$ ,  $n_Y = 10$  and 100 runs. Evaluation of the first step of the ORdensity method using different values of  $\alpha$ . The Table shows the estimated probability,  $\hat{p}_m$ , of no considering as a potential DE gene at least one gene that it really is; the mean proportion of DE genes (row named “%”) that the procedure considered as potential DE genes, and distribution of truly DE genes that are not considered as a potential DE gene in relation with their value of  $\Delta_g$  taken by chance in  $\{1.5, 2, 3\}$ .**

| Nb. of DE genes |                                                | $\alpha$       |                   |                   |
|-----------------|------------------------------------------------|----------------|-------------------|-------------------|
|                 |                                                | 0.1            | 0.05              | 0.01              |
| 50              | $\hat{p}_m$                                    | 0.38           | 0.75              | 1                 |
|                 | %                                              | 99.1 (1.2)     | 97.7 (1.9)        | 99.8 (3.8)        |
|                 | $(\Delta_g = 1.5, \Delta_g = 2, \Delta_g = 3)$ | (97.4, 2.6, 0) | (97.3, 2.7, 0)    | (85.9, 14.1, 0)   |
| 100             | $\hat{p}_m$                                    | 0.73           | 0.95              | 1                 |
|                 | %                                              | 98.8 (1.0)     | 96.8 (1.7)        | 86.6 (3.4)        |
|                 | $(\Delta_g = 1.5, \Delta_g = 2, \Delta_g = 3)$ | (95.9, 4.1, 0) | (91.0, 9.0, 0)    | (82.2, 17.5, 0.3) |
| 200             | $\hat{p}_m$                                    | 1              | 1                 | 1                 |
|                 | %                                              | 96.2 (1.4)     | 91.0 (2.2)        | 71.1 (3.4)        |
|                 | $(\Delta_g = 1.5, \Delta_g = 2, \Delta_g = 3)$ | (92.7, 7.3, 0) | (86.7, 13.1, 0.2) | (96.3, 3.7, 0)    |

**Table 17 Simulation study 1, scenario 3 with  $n_X = n_Y = 10$  and 100 runs. Evaluation of the first step of the ORdensity method using different values of  $\alpha$ . The Table shows the estimated probability,  $\hat{p}_m$ , of no considering as a potential DE gene at least one gene that it really is; the mean proportion of DE genes (row named “%”) that the procedure considered as potential DE genes, and distribution of truly DE genes that are not considered as a potential DE gene in relation with their value of  $\Delta_g$  taken by chance in  $\{1.5, 2, 3\}$ .**

| Nb. DE genes |                                                | $\alpha$          |                   |                    |
|--------------|------------------------------------------------|-------------------|-------------------|--------------------|
|              |                                                | 0.1               | 0.05              | 0.01               |
| 50           | $\hat{p}_m$                                    | 0.91              | 0.98              | 1                  |
|              | %                                              | 95.3 (3.1)        | 91.0 (4.1)        | 73.1 (6.4)         |
|              | $(\Delta_g = 1.5, \Delta_g = 2, \Delta_g = 3)$ | (89.5, 10.5, 0)   | (83.7, 16.3, 0)   | (67.0, 30.7, 0.0)  |
| 100          | $\hat{p}_m$                                    | 1                 | 1                 | 1                  |
|              | %                                              | 94.3 (2.3)        | 87.6 (3.2)        | 65.8 (5.4)         |
|              | $(\Delta_g = 1.5, \Delta_g = 2, \Delta_g = 3)$ | (83.9, 15.9, 0.2) | (79.1, 20.3, 0.6) | (63.7, 32.1, 4.2)  |
| 200          | $\hat{p}_m$                                    | 1                 | 1                 | 1                  |
|              | %                                              | 87.0 (2.1)        | 75.8 (2.8)        | 51.5 (3.8)         |
|              | $(\Delta_g = 1.5, \Delta_g = 2, \Delta_g = 3)$ | (76.5, 23.0, 0.4) | (67.4, 30.7, 1.9) | (52.4, 37.6, 10.0) |

**Table 18 Simulation study 1, scenario 2 with  $n_X = n_Y = 30$  and 100 runs. Evaluation of the second step of the ORdensity method with  $\alpha = 0.05$ . In the first two columns, the delta  $\Delta$  values and number of total simulated DE genes. In column 3, the  $10 \times f_0$  values where  $f_0$  is the average proportion of permuted cases in sets  $U_i$ . In column 4, the "\*" indicates the clusters considered by the procedure. Columns 5-8 contain for each cluster: the mean number of genes ( $\bar{n}_i$ ), the mean of OR values ( $\overline{OR}$ ), the mean of  $FP$  values ( $\overline{FP}$ ), the mean of  $dFP$  values ( $\overline{dFP}$ ). In the last column the mean of False Positive genes per cluster in % ( $\overline{FPC}$ ). Corresponding standard deviations are in brackets.**

| $\Delta$ | DE  | $10f_0$ | $C_i$   | $\bar{n}_i$ (sd) | $\overline{OR}$ (sd) | $\overline{FP}$ (sd) | $\overline{dFP}$ (sd) | $\overline{FPC}$ (sd) |
|----------|-----|---------|---------|------------------|----------------------|----------------------|-----------------------|-----------------------|
| 1.5      | 50  | 8.7     | $C_1^*$ | 24.6 (9.2)       | 51.4 (10.0)          | 0.2 (0.2)            | 0.1 (0.2)             | 0.0 (0.5)             |
|          |     |         | $C_2^*$ | 23.0 (6.7)       | 23.1 (5.2)           | 3.4 (2.0)            | 3.3 (2.6)             | 6.4 (11.3)            |
|          |     |         | $C_3$   | 27.6 (4.7)       | 8.7 (0.8)            | 9.2 (0.3)            | 23.6 (2.7)            | 87.9 (8.0)            |
|          | 100 | 8.1     | $C_1^*$ | 31.8 (11.1)      | 50.3 (6.6)           | 0.0 (0.0)            | 0.0 (0.0)             | 0.0 (0)               |
|          |     |         | $C_2^*$ | 59.6 (10.8)      | 23.5 (2.7)           | 1.1 (0.7)            | 1.1 (0.7)             | 0.3 (1.4)             |
|          |     |         | $C_3$   | 24.6 (9.2)       | 9.1 (0.7)            | 8.7 (0.4)            | 18.3 (2.2)            | 65.8 (10.7)           |
|          | 200 | 7.1     | $C_1^*$ | 32.5 (14.1)      | 33.5 (3.3)           | 0.0 (0.0)            | 0.0 (0.0)             | 0.0 (0)               |
|          |     |         | $C_2^*$ | 116.8(13.4)      | 16.1 (1.2)           | 0.4 (0.1)            | 0.5 (0.2)             | 0.3 (0.5)             |
|          |     |         | $C_3$   | 21.1 (6.3)       | 8.1 (0.6)            | 6.2 (1.1)            | 8.8 (2.0)             | 17.3 (10.1)           |
| 2        | 50  | 8.7     | $C_1^*$ | 17.7 (6.1)       | 97.7 (14.9)          | 0.0 (0.0)            | 0.0 (0.0)             | 0.0 (0)               |
|          |     |         | $C_2^*$ | 31.6 (5.5)       | 46.4 (5.3)           | 0.7 (0.5)            | 0.4 (0.3)             | 0.4 (1.3)             |
|          |     |         | $C_3$   | 26.9 (4.2)       | 8.9 (0.6)            | 9.3 (0.2)            | 24.1 (1.9)            | 95.9 (3.8)            |
|          | 100 | 8.1     | $C_1^*$ | 33.7 (8.9)       | 82.8 (10.1)          | 0.0 (0.0)            | 0.0 (0.0)             | 0.0 (0)               |
|          |     |         | $C_2^*$ | 65.1 (8.7)       | 39.5 (3.1)           | 0.3 (0.1)            | 0.2 (0.1)             | 0.3 (0.6)             |
|          |     |         | $C_3$   | 19.5 (3.5)       | 8.8 (0.7)            | 9.3 (0.3)            | 21.6 (2.0)            | 92.9 (5.9)            |
|          | 200 | 7.1     | $C_1^*$ | 67.7 (17.6)      | 54.2 (5.8)           | 0.0 (0.0)            | 0.0 (0.0)             | 0.0 (0)               |
|          |     |         | $C_2^*$ | 115.3 (22.0)     | 27.2 (4.7)           | 0.1 (0.1)            | 0.1 (0.1)             | 0.1 (0.3)             |
|          |     |         | $C_3$   | 21.4 (30.2)      | 10.6 (4.9)           | 7.2 (3.2)            | 10.6 (5.4)            | 54.2 (30.3)           |
| 3        | 50  | 8.7     | $C_1^*$ | 17.6 (6.1)       | 205.9 (29.4)         | 0.0 (0.0)            | 0.0 (0.0)             | 0.0 (0)               |
|          |     |         | $C_2^*$ | 32.5 (5.5)       | 101.9 (12.9)         | 0.2 (0.9)            | 0.2 (1.7)             | 1.0 (10.0)            |
|          |     |         | $C_3$   | 24.8 (4.4)       | 8.6 (0.6)            | 9.3 (0.2)            | 24.6 (2.0)            | 99.8(0.8)             |
|          | 100 | 8.1     | $C_1^*$ | 36.3 (8.3)       | 174.7 (17.6)         | 0.0 (0.0)            | 0.0 (0.0)             | 0.0 (0)               |
|          |     |         | $C_2^*$ | 63.6 (8.3)       | 87.2 (7.1)           | 0.0 (0.0)            | 0.0 (0.0)             | 0.0 (0.2)             |
|          |     |         | $C_3$   | 18.1 (3.6)       | 8.5 (0.7)            | 9.4 (0.3)            | 22.8 (1.9)            | 99.4 (1.9)            |
|          | 200 | 7.1     | $C_1^*$ | 70.0 (17.2)      | 115.0 (12.4)         | 0.0 (0.0)            | 0.0 (0.0)             | 0.0 (0)               |
|          |     |         | $C_2^*$ | 120.7 (21.3)     | 59.2 (8.3)           | 0.0 (0.0)            | 0.0 (0.0)             | 0.0 (0.0)             |
|          |     |         | $C_3$   | 14.8 (25.2)      | 12.2 (12.5)          | 8.4 (3.0)            | 14.8 (5.7)            | 88.4 (31.3)           |

**Table 19 Simulation study 1, scenario 3 with  $n_X = n_Y = 30$  and 100 runs. Evaluation of the second step of the ORdensity method with  $\alpha = 0.05$ . In the first column the number of total simulated DE genes. In column 2, the  $10 \times f_0$  values where  $f_0$  is the average proportion of permuted cases in sets  $U_i$ . In column 4, the "\*" indicates the clusters considered by the procedure. In column 3, the "\*" indicates the clusters considered by the procedure. Columns 4-7 contain for each cluster: the mean number of genes ( $\bar{n}_i$ ), the mean of OR values ( $\overline{OR}$ ), the mean of  $FP$  values ( $\overline{FP}$ ), the mean of  $dFP$  values ( $\overline{dFP}$ ). In column 8 the mean of False Positive genes per cluster in % ( $\overline{FPC}$ ). Corresponding standard deviations are in brackets. In the last column, distribution of DE genes in accordance with their  $\Delta_g$  value that they have taken by chance in  $\{1.5, 2, 3\}$ .**

| DE  | $10f_0$ | $C_i$   | $\bar{n}_i$ (sd) | $\overline{OR}$ (sd) | $\overline{FP}$ (sd) | $\overline{dFP}$ (sd) | $\overline{FPC}$ (sd) | Distribution DE genes according with $\Delta_g$ |
|-----|---------|---------|------------------|----------------------|----------------------|-----------------------|-----------------------|-------------------------------------------------|
| 50  | 8.7     | $C_1^*$ | 17.7 (7.6)       | 146.6 (35.2)         | 0.0 (0.1)            | 0.0 (0.0)             | 0.0 (0.3)             | (3.5, 17.7, 78.8)                               |
|     |         | $C_2^*$ | 29.9 (6.0)       | 45.8 (10.6)          | 1.5 (1.5)            | 1.1 (1.8)             | 2.6 (8.9)             | (47.6, 42.7, 9.6)                               |
|     |         | $C_3$   | 27.7 (4.8)       | 9.2 (0.8)            | 9.2 (0.2)            | 23.4 (2.3)            | 89.3 (6.4)            | (94.5, 5.5, 0)                                  |
| 100 | 8.1     | $C_1^*$ | 31.8 (11.1)      | 50.3 (6.6)           | 0.0 (0.0)            | 0.0 (0.0)             | 0.0 (0.0)             | (1.9, 15.6, 82.4)                               |
|     |         | $C_2^*$ | 59.6 (10.8)      | 23.5 (2.7)           | 1.1 (0.7)            | 0.4 (0.2)             | 0.3 (0.8)             | (44.2, 43.8, 12.0)                              |
|     |         | $C_3$   | 24.6 (9.2)       | 9.1 (0.7)            | 8.7 (0.4)            | 19.5 (2.1)            | 76.4 (9.8)            | (95.9, 4.1, 0)                                  |
| 200 | 7.1     | $C_1^*$ | 32.5 (14.1)      | 33.5 (3.3)           | 0.0 (0.0)            | 0.0 (0.0)             | 0.0 (0)               | (1.8, 14.8, 83.4)                               |
|     |         | $C_2^*$ | 116.8(13.4)      | 16.1 (1.2)           | 0.4 (0.1)            | 0.2 (0.1)             | 0.1 (0.3)             | (43.5, 44.5, 12.0)                              |
|     |         | $C_3$   | 21.1 (6.3)       | 8.1 (0.6)            | 6.2 (1.1)            | 9.3 (2.2)             | 25.1 (13.2)           | (95.4, 4.6, 0)                                  |

**Table 20 Simulation study 1, scenario 1 with  $n_X = 30$ ,  $n_Y = 10$  and 100 runs. Evaluation of the second step of the ORdensity method with  $\alpha = 0.05$ . In the first two columns, the delta  $\Delta$  values and number of total simulated DE genes. In column 3, the  $10 \times f_0$  values where  $f_0$  is the average proportion of permuted cases in sets  $U_i$ . In column 4, the "\*" indicates the clusters considered by the procedure. Columns 5-8 contain for each cluster: the mean number of genes ( $\bar{n}_i$ ), the mean of OR values ( $\overline{OR}$ ), the mean of  $FP$  values ( $\overline{FP}$ ), the mean of  $dFP$  values ( $\overline{dFP}$ ). In the last column the mean of False Positive genes per cluster in % ( $\overline{FPC}$ ). Corresponding standard deviations are in brackets.**

| $\Delta$       | DE  | $10f_0$ | $C_i$   | $\bar{n}_i$ (sd) | $\overline{OR}$ (sd) | $\overline{FP}$ (sd) | $\overline{dFP}$ (sd) | $\overline{FPC}$ (sd) |
|----------------|-----|---------|---------|------------------|----------------------|----------------------|-----------------------|-----------------------|
| $\Delta = 1.5$ | 50  | 8.6     | $C_1^*$ | 21.9 (5.5)       | 33.6 (5.7)           | 3.5 (0.8)            | 2.5 (1.0)             | 4.5 (4.6)             |
|                |     |         | $C_2^*$ | 29.7 (6.9)       | 14.2 (2.1)           | 7.7 (0.7)            | 11.4 (2.3)            | 35.3 (12.3)           |
|                |     |         | $C_3$   | 28.3 (7.5)       | 8.6 (0.5)            | 9.3 (0.2)            | 23.9 (2.2)            | 80.9 (8.6)            |
|                | 100 | 8.6     | $C_1^*$ | 35.1 (8.7)       | 30.1 (3.8)           | 1.7 (0.4)            | 1.4 (0.5)             | 1.4 (2.1)             |
|                |     |         | $C_2^*$ | 38.1 (6.5)       | 14.3 (1.7)           | 5.5 (0.9)            | 7.3 (1.7)             | 10.6 (5.6)            |
|                |     |         | $C_3$   | 35.7 (7.9)       | 8.9 (0.5)            | 8.6 (0.4)            | 18.4 (2.0)            | 48.6 (10.1)           |
|                | 200 | 7.7     | $C_1^*$ | 47.9 (12.1)      | 22.9 (2.4)           | 0.6 (0.2)            | 0.5 (0.2)             | 0.2 (0.7)             |
|                |     |         | $C_2^*$ | 60.3 (11.6)      | 11.8 (0.9)           | 2.4 (0.6)            | 3.2 (0.8)             | 2.1 (1.9)             |
|                |     |         | $C_3$   | 38.9 (8.3)       | 8.2 (0.3)            | 6.1 (0.6)            | 10.1 (1.2)            | 10.2 (5.2)            |
| $\Delta = 2$   | 50  | 8.5     | $C_1^*$ | 29.6 (5.9)       | 47.2 (7.6)           | 1.2 (0.8)            | 0.8 (0.4)             | 0.7 (1.4)             |
|                |     |         | $C_2^*$ | 24.0 (4.5)       | 18.9 (4.3)           | 6.5 (1.6)            | 7.4 (2.9)             | 27.0 (16.0)           |
|                |     |         | $C_3$   | 31.6 (6.8)       | 9.0 (0.7)            | 9.2 (0.2)            | 22.5 (2.4)            | 91.4 (6.1)            |
|                | 100 | 8.1     | $C_1^*$ | 40.6 (13.4)      | 46.6 (7.9)           | 0.2 (0.1)            | 0.2 (0.1)             | 0.1 (0.5)             |
|                |     |         | $C_2^*$ | 44.2 (12.0)      | 21.2 (3.3)           | 2.8 (1.2)            | 2.8 (1.3)             | 3.8 (3.2)             |
|                |     |         | $C_3$   | 35.4 (6.2)       | 10.0 (0.7)           | 8.6 (0.4)            | 15.9 (1.9)            | 57.9 (10.1)           |
|                | 200 | 7.3     | $C_1^*$ | 53.6 (18.2)      | 32.3 (4.4)           | 0.1 (0.0)            | 0.1 (0.0)             | 0.1 (0.3)             |
|                |     |         | $C_2^*$ | 99.3 (16.0)      | 15.3 (1.6)           | 0.8 (0.3)            | 1.0 (0.4)             | 0.5 (0.8)             |
|                |     |         | $C_3$   | 35.6 (8.7)       | 8.6 (0.5)            | 5.5 (0.8)            | 7.3 (1.2)             | 10.4 (5.2)            |
| $\Delta = 3$   | 50  | 8.5     | $C_1^*$ | 23.5 (11.1)      | 114.4 (25.6)         | 0.1 (0.1)            | 0.0 (0.1)             | 0.0 (0.0)             |
|                |     |         | $C_2^*$ | 27.6 (7.9)       | 48.7 (14.8)          | 2.1 (2.5)            | 1.9 (3.6)             | 9.9 (24.5)            |
|                |     |         | $C_3$   | 36.6 (6.1)       | 10.0 (0.9)           | 9.2 (0.2)            | 21.3 (2.1)            | 97.0(3.0)             |
|                | 100 | 8.0     | $C_1^*$ | 33.3 (5.7)       | 100.7 (14.0)         | 0.0 (0.0)            | 0.0 (0.0)             | 0.0 (0.0)             |
|                |     |         | $C_2^*$ | 64.5 (8.7)       | 45.9 (4.8)           | 0.5 (0.2)            | 0.3 (0.1)             | 0.5 (1.1)             |
|                |     |         | $C_3$   | 27.0 (5.1)       | 10.0 (0.7)           | 9.1 (0.3)            | 18.0 (1.5)            | 90.9 (5.8)            |
|                | 200 | 7.1     | $C_1^*$ | 65.8 (12.2)      | 59.0 (6.2)           | 0.0 (0.0)            | 0.0 (0.0)             | 0.0 (0.0)             |
|                |     |         | $C_2^*$ | 126.0 (15.7)     | 27.6 (2.8)           | 0.3 (0.1)            | 0.2 (0.1)             | 0.2 (0.4)             |
|                |     |         | $C_3$   | 13.6 (14.6)      | 10.0 (2.5)           | 7.7 (2.0)            | 8.9 (3.1)             | 53.7 (26.2)           |

**Table 21 Simulation study 1, scenario 2 with  $n_X = 30$ ,  $n_Y = 10$  and 100 runs. Evaluation of the second step of the ORdensity method with  $\alpha = 0.05$ . In the first two columns, the delta  $\Delta$  values and number of total simulated DE genes. In column 3, the  $10 \times f_0$  values where  $f_0$  is the average proportion of permuted cases in sets  $U_i$ . In column 4, the "\*" indicates the clusters considered by the procedure. Columns 5-8 contain for each cluster: the mean number of genes ( $\bar{n}_i$ ), the mean of OR values ( $\overline{OR}$ ), the mean of FP values ( $\overline{FP}$ ), the mean of dFP values ( $\overline{dFP}$ ). In the last column the mean of False Positive genes per cluster in % ( $\overline{FPC}$ ). Corresponding standard deviations are in brackets.**

| $\Delta$ | DE  | $10f_0$ | $C_i$   | $\bar{n}_i$ (sd) | $\overline{OR}$ (sd) | $\overline{FP}$ (sd) | $\overline{dFP}$ (sd) | $\overline{FPC}$ (sd) |
|----------|-----|---------|---------|------------------|----------------------|----------------------|-----------------------|-----------------------|
| 1.5      | 50  | 8.6     | $C_1^*$ | 23.4 (5.8)       | 38.4 (7.4)           | 2.6 (0.8)            | 1.7 (0.8)             | 3.8 (4.1)             |
|          |     |         | $C_2^*$ | 28.7 (5.4)       | 15.1 (2.3)           | 7.1 (0.8)            | 8.9 (2.1)             | 32.3 (12.9)           |
|          |     |         | $C_3$   | 28.1 (7.4)       | 8.8 (0.5)            | 9.2 (0.2)            | 21.6 (2.1)            | 81.5 (8.2)            |
|          | 100 | 8.1     | $C_1^*$ | 37.0 (8.7)       | 35.3 (4.8)           | 1.0 (0.4)            | 0.7 (0.4)             | 1.7 (2.2)             |
|          |     |         | $C_2^*$ | 39.2 (6.1)       | 15.5 (2.3)           | 4.6 (1.0)            | 5.3 (1.6)             | 9.6 (5.9)             |
|          |     |         | $C_3$   | 36.3 (6.6)       | 8.9 (0.5)            | 8.5 (0.4)            | 16.0 (2.0)            | 48.1 (8.9)            |
|          | 200 | 7.6     | $C_1^*$ | 53.0 (16.2)      | 26.5 (4.3)           | 0.2 (0.1)            | 0.3 (0.1)             | 0.5 (1.0)             |
|          |     |         | $C_2^*$ | 68.5 (12.7)      | 12.3 (1.3)           | 1.8 (0.5)            | 2.2 (0.7)             | 2.3 (2.0)             |
|          |     |         | $C_3$   | 39.6 (9.4)       | 8.2 (0.4)            | 5.8 (0.6)            | 8.4 (1.1)             | 12.3 (5.4)            |
| 2        | 50  | 8.6     | $C_1^*$ | 30.3 (7.0)       | 54.1 (9.1)           | 0.8 (0.4)            | 0.4 (0.3)             | 1.2 (2.2)             |
|          |     |         | $C_2^*$ | 24.4 (4.6)       | 19.9 (5.0)           | 5.9 (1.8)            | 6.1 (2.8)             | 28.0 (18.0)           |
|          |     |         | $C_3$   | 30.0 (6.0)       | 9.1 (0.8)            | 9.2 (0.2)            | 20.8 (2.3)            | 92.8 (5.8)            |
|          | 100 | 8.0     | $C_1^*$ | 37.8 (14.5)      | 57.7 (10.7)          | 0.1 (0.1)            | 0.1 (0.1)             | 0.1 (0.7)             |
|          |     |         | $C_2^*$ | 51.7 (12.0)      | 24.0 (4.2)           | 2.2 (1.2)            | 1.9 (1.1)             | 4.2 (3.8)             |
|          |     |         | $C_3$   | 32.6 (5.6)       | 10.1 (0.8)           | 8.6 (0.4)            | 14.7 (1.6)            | 64.9 (9.8)            |
|          | 200 | 7.2     | $C_1^*$ | 55.3 (19.8)      | 40.6 (6.2)           | 0.0 (0.1)            | 0.0 (0.0)             | 0.1 (0.3)             |
|          |     |         | $C_2^*$ | 110.9 (17.8)     | 17.0 (1.8)           | 0.7 (0.4)            | 0.7 (0.4)             | 0.9 (1.0)             |
|          |     |         | $C_3$   | 30.3 (7.5)       | 8.7 (0.5)            | 5.8 (0.9)            | 7.0 (1.3)             | 16.3 (8.5)            |
| 3        | 50  | 8.5     | $C_1^*$ | 22.6 (12.3)      | 144.8 (42.6)         | 0.0 (0.1)            | 0.0 (0.0)             | 0.2 (0.7)             |
|          |     |         | $C_2^*$ | 29.3 (7.8)       | 53.9 (18.6)          | 2.0 (2.7)            | 1.8 (3.6)             | 13.6 (28.3)           |
|          |     |         | $C_3$   | 34.7 (6.1)       | 10.2 (1.1)           | 9.2 (0.2)            | 19.7 (2.2)            | 96.8 (3.2)            |
|          | 100 | 8.0     | $C_1^*$ | 31.2 (9.8)       | 132.4 (24.7)         | 0.0 (0.0)            | 0.0 (0.0)             | 0.0 (0.0)             |
|          |     |         | $C_2^*$ | 67.6 (9.8)       | 53.0 (5.6)           | 0.4 (0.2)            | 0.2 (0.1)             | 0.9 (1.3)             |
|          |     |         | $C_3$   | 27.5 (4.8)       | 10.1 (0.8)           | 9.1 (0.3)            | 16.9 (1.3)            | 93.6 (4.8)            |
|          | 200 | 7.1     | $C_1^*$ | 59.9 (12.7)      | 79.0 (8.8)           | 0.0 (0.0)            | 0.0 (0.0)             | 0.0 (0.1)             |
|          |     |         | $C_2^*$ | 136.9 (14.4)     | 31.9 (2.7)           | 0.2 (0.1)            | 0.1 (0.1)             | 0.4 (0.6)             |
|          |     |         | $C_3$   | 10.8 (9.5)       | 9.0 (1.8)            | 8.6 (1.1)            | 10.0 (2.1)            | 72.8 (17.5)           |

**Table 22 Simulation study 1, scenario 3 with  $n_X = 30$ ,  $n_Y = 10$  and 100 runs. Evaluation of the second step of the ORdensity method with  $\alpha = 0.05$ . In the first column the number of total simulated DE genes. In column 2, the  $10 \times f_0$  values where  $f_0$  is the average proportion of permuted cases in sets  $U_i$ . In column 3, the "\*" indicates the clusters considered by the procedure. Columns 4-7 contain for each cluster: the mean number of genes ( $\bar{n}_i$ ), the mean of OR values ( $\overline{OR}$ ), the mean of FP values ( $\overline{FP}$ ), the mean of dFP values ( $\overline{dFP}$ ). In column 8 the mean of False Positive genes per cluster in % ( $\overline{FPC}$ ). Corresponding standard deviations are in brackets. In the last column, distribution of DE genes in accordance with their  $\Delta_g$  value that they have taken by chance in {1.5, 2, 3}.**

| DE  | $10f_0$ | $C_i$   | $\bar{n}_i$ (sd) | $\overline{OR}$ (sd) | $\overline{FP}$ (sd) | $\overline{dFP}$ (sd) | $\overline{FPC}$ (sd) | Distribution DE genes according to $\Delta_g$ |
|-----|---------|---------|------------------|----------------------|----------------------|-----------------------|-----------------------|-----------------------------------------------|
| 50  | 8.6     | $C_1^*$ | 29.8 (5.4)       | 77.0 (13.7)          | 0.7 (0.4)            | 0.3 (0.2)             | 1.1 (2.0)             | (13.3, 31.2, 55.5)                            |
|     |         | $C_2^*$ | 25.0 (5.1)       | 19.6 (5.1)           | 6.5 (1.4)            | 6.7 (2.5)             | 32.8 (15.6)           | (55.2, 39.2, 5.6)                             |
|     |         | $C_3$   | 29.3 (6.6)       | 9.0 (0.7)            | 9.3 (0.2)            | 21.3 (2.1)            | 89.3 (7.6)            | (85.6, 14.3, 0.1)                             |
| 100 | 8.1     | $C_1^*$ | 39.3 (14.4)      | 80.7 (16.9)          | 0.1 (0.1)            | 0.1 (0.1)             | 1.1 (2.0)             | (7.8, 23.2, 69.1)                             |
|     |         | $C_2^*$ | 44.7 (11.7)      | 16.2 (6.6)           | 2.5 (1.5)            | 2.3 (1.6)             | 5.7 (5.9)             | (39.9, 45.1, 15.0)                            |
|     |         | $C_3$   | 36.8 (6.5)       | 10.0 (0.8)           | 8.5 (0.4)            | 15.0 (1.7)            | 60.0 (9.3)            | (75.3, 24.4, 0.3)                             |
| 200 | 7.3     | $C_1^*$ | 46.2 (17.3)      | 65.1 (13.0)          | 0.0 (0.0)            | 0.0 (0.0)             | 0.0 (0.2)             | (3.7, 14.8, 81.5)                             |
|     |         | $C_2^*$ | 107.0 (17.4)     | 21.2 (2.9)           | 0.7 (0.3)            | 0.6 (0.4)             | 1.0 (1.1)             | (28.8, 43.8, 27.4)                            |
|     |         | $C_3$   | 35.5 (7.5)       | 8.8 (0.5)            | 6.0 (0.7)            | 7.5 (1.1)             | 16.6 (6.6)            | (67.9, 30.8, 1.3)                             |

**Table 23 Simulation study 1, scenario 3 with  $n_X = n_Y = 10$  and 100 runs. Evaluation of the second step of the ORdensity method with  $\alpha = 0.05$ . In the first column the number of total simulated DE genes. In column 2, the  $10 \times f_0$  values where  $f_0$  is the average proportion of permuted cases in sets  $U_i$ . In column 3, the “\*” indicates the clusters considered by the procedure. Columns 4-7 contain for each cluster: the mean number of genes ( $\bar{n}_i$ ), the mean of OR values ( $\overline{OR}$ ), the mean of FP values ( $\overline{FP}$ ), the mean of dFP values ( $\overline{dFP}$ ). In column 8 the mean of False Positive genes per cluster in % ( $\overline{FPC}$ ). Corresponding standard deviations are in brackets. In the last column, distribution of DE genes in accordance with their  $\Delta_g$  value that they have taken by chance in {1.5, 2, 3}.**

| DE  | $10f_0$ | $C_i$   | $\bar{n}_i$ (sd) | $\overline{OR}$ (sd) | $\overline{FP}$ (sd) | $\overline{dFP}$ (sd) | $\overline{FPC}$ (sd) | Distribution DE genes   |
|-----|---------|---------|------------------|----------------------|----------------------|-----------------------|-----------------------|-------------------------|
|     |         |         |                  |                      |                      |                       |                       | according to $\Delta_g$ |
| 50  | 8.6     | $C_1^*$ | 21.6 (5.3)       | 77.7 (22.2)          | 2.8 (0.7)            | 1.0 (0.5)             | 3.4 (4.2)             | (11.2, 27.5, 61.2)      |
|     |         | $C_2^*$ | 30.0 (5.5)       | 20.5 (5.5)           | 7.5 (0.9)            | 7.5 (1.9)             | 34.4 (12.8)           | (37.2, 42.3, 20.5)      |
|     |         | $C_3$   | 29.8 (8.4)       | 10.0 (0.8)           | 9.2 (0.3)            | 17.8 (1.7)            | 83.0 (8.2)            | (63.7, 34.6, 1.7)       |
| 100 | 8.2     | $C_1^*$ | 38.3 (8.7)       | 67.1 (12.0)          | 1.4 (0.5)            | 0.6 (0.3)             | 1.1 (1.7)             | (10.4, 25.8, 63.8)      |
|     |         | $C_2^*$ | 36.6 (6.1)       | 20.9 (4.1)           | 5.4 (1.1)            | 4.8 (1.5)             | 11.9 (7.1)            | (31.1, 43.0, 25.8)      |
|     |         | $C_3$   | 35.6 (8.2)       | 10.4 (0.9)           | 8.8 (0.3)            | 13.8 (1.5)            | 52.2 (11.1)           | (59.0, 36.3, 4.7)       |
| 200 | 7.6     | $C_1^*$ | 55.8 (17.0)      | 51.4 (12.6)          | 0.6 (0.3)            | 0.3 (0.2)             | 0.3 (0.6)             | (8.2, 22.5, 69.3)       |
|     |         | $C_2^*$ | 60.6 (14.3)      | 18.0 (3.5)           | 2.6 (0.7)            | 2.2 (0.7)             | 2.1 (2.1)             | (23.0, 38.2, 38.8)      |
|     |         | $C_3$   | 42.6 (9.6)       | 9.8 (0.7)            | 6.6 (0.5)            | 7.6 (0.9)             | 14.4 (5.4)            | (44.1, 43.8, 12.1)      |

**Table 24 AUC mean values for Simulation study 1, scenario 2 and 100 runs**

| $n_X = n_Y = 30$     |          |         |         |         |         |         |         |         |         |         |
|----------------------|----------|---------|---------|---------|---------|---------|---------|---------|---------|---------|
| Nb. of DE genes      | $\Delta$ | 50      |         |         | 100     |         |         | 200     |         |         |
|                      |          | 1.5     | 2       | 3       | 1.5     | 2       | 3       | 1.5     | 2       | 3       |
| ORdensity            |          | 0.998   | 0.997   | 0.997   | 0.998   | 0.997   | 0.995   | 0.998   | 0.996   | 0.993   |
|                      |          | (0.001) | (0.001) | (0.000) | (0.001) | (0.002) | (0.000) | (0.001) | (0.003) | (0.000) |
|                      | limma    | 0.995   | 0.993   | 0.993   | 0.996   | 0.993   | 0.993   | 0.997   | 0.992   | 0.992   |
| SAM                  |          | (0.002) | (0.001) | (0.000) | (0.003) | (0.001) | (0.000) | (0.003) | (0.001) | (0.000) |
|                      |          | 0.995   | 0.994   | 0.993   | 0.996   | 0.993   | 0.993   | 0.997   | 0.993   | 0.992   |
|                      |          | (0.002) | (0.001) | (0.000) | (0.003) | (0.001) | (0.000) | (0.003) | (0.002) | (0.000) |
| $n_X = 30, n_Y = 10$ |          |         |         |         |         |         |         |         |         |         |
| Nb. of DE genes      | $\Delta$ | 50      |         |         | 100     |         |         | 200     |         |         |
|                      |          | 1.5     | 2       | 3       | 1.5     | 2       | 3       | 1.5     | 2       | 3       |
| ORdensity            |          | 0.981   | 0.997   | 0.998   | 0.980   | 0.997   | 0.998   | 0.971   | 0.995   | 0.998   |
|                      |          | (0.008) | (0.003) | (0.001) | (0.005) | (0.002) | (0.002) | (0.006) | (0.001) | (0.003) |
|                      | limma    | 0.976   | 0.997   | 0.993   | 0.987   | 0.998   | 0.993   | 0.995   | 0.999   | 0.992   |
| SAM                  |          | (0.010) | (0.003) | (0.001) | (0.005) | (0.002) | (0.001) | (0.001) | (0.001) | (0.001) |
|                      |          | 0.949   | 0.993   | 0.993   | 0.956   | 0.994   | 0.993   | 0.970   | 0.997   | 0.992   |
|                      |          | (0.015) | (0.005) | (0.001) | (0.011) | (0.003) | (0.001) | (0.008) | (0.002) | (0.001) |
| $n_X = n_Y = 10$     |          |         |         |         |         |         |         |         |         |         |
| Nb. of DE genes      | $\Delta$ | 50      |         |         | 100     |         |         | 200     |         |         |
|                      |          | 1.5     | 2       | 3       | 1.5     | 2       | 3       | 1.5     | 2       | 3       |
| ORdensity            |          | 0.943   | 0.983   | 0.998   | 0.939   | 0.981   | 0.998   | 0.921   | 0.972   | 0.998   |
|                      |          | (0.013) | (0.007) | (0.001) | (0.010) | (0.006) | (0.001) | (0.010) | (0.006) | (0.001) |
|                      | limma    | 0.912   | 0.984   | 0.994   | 0.944   | 0.991   | 0.994   | 0.976   | 0.997   | 0.995   |
| SAM                  |          | (0.021) | (0.008) | (0.002) | (0.011) | (0.004) | (0.002) | (0.005) | (0.001) | (0.004) |
|                      |          | 0.885   | 0.967   | 0.994   | 0.890   | 0.968   | 0.994   | 0.02    | 0.981   | 0.996   |
|                      |          | (0.020) | (0.016) | (0.002) | (0.015) | (0.009) | (0.002) | (0.014) | (0.005) | (0.004) |

**Table 25 AUC mean values for Simulation study 1, scenario 3 and 100 runs**

| $n_X = n_Y = 30$ |                   |                  |                  |
|------------------|-------------------|------------------|------------------|
| Nb. of DE genes  | 50                | 100              | 200              |
|                  | $\Delta$ variable |                  |                  |
| ORdensity        | 0.998<br>(0.001)  | 0.998<br>(0.002) | 0.999<br>(0.001) |
| limma            | 0.994<br>(0.002)  | 0.995<br>(0.003) | 0.995<br>(0.003) |
| SAM              | 0.994<br>(0.002)  | 0.995<br>(0.003) | 0.996<br>(0.003) |

  

| $n_X = 30, n_Y = 10$ |                   |                  |                  |
|----------------------|-------------------|------------------|------------------|
| Nb. of DE genes      | 50                | 100              | 200              |
|                      | $\Delta$ variable |                  |                  |
| ORdensity            | 0.993<br>(0.004)  | 0.992<br>(0.003) | 0.991<br>(0.002) |
| limma                | 0.991<br>(0.005)  | 0.994<br>(0.003) | 0.997<br>(0.001) |
| SAM                  | 0.980<br>(0.010)  | 0.983<br>(0.006) | 0.989<br>(0.004) |

  

| $n_X = n_Y = 10$ |                   |                  |                  |
|------------------|-------------------|------------------|------------------|
| Nb. of DE genes  | 50                | 100              | 200              |
|                  | $\Delta$ variable |                  |                  |
| ORdensity        | 0.975<br>(0.009)  | 0.974<br>(0.006) | 0.968<br>(0.005) |
| limma            | 0.967<br>(0.012)  | 0.980<br>(0.006) | 0.993<br>(0.002) |
| SAM              | 0.950<br>(0.015)  | 0.956<br>(0.009) | 0.971<br>(0.006) |

**Table 26 Simulation study 2 with  $n_X = 30, n_Y = 10$  and 100 runs. Evaluation of the first step of the ORdensity method using different values of  $\alpha$ . The Table shows the estimated probability,  $\hat{p}_m$ , of no considering as a potential DE gene at least one gene that it really is, and the mean proportion of DE genes (row named “%”) that the procedure considered as potential DE genes.**

| Nb. of DE genes per block |             | 1 block  |         |         | 2 blocks   |            |            | 3 blocks   |            |             |
|---------------------------|-------------|----------|---------|---------|------------|------------|------------|------------|------------|-------------|
|                           |             | $\alpha$ |         |         | $\alpha$   |            |            | $\alpha$   |            |             |
|                           |             | 0.1      | 0.05    | 0.01    | 0.1        | 0.05       | 0.01       | 0.1        | 0.05       | 0.01        |
| 5                         | $\hat{p}_m$ | 0        | 0       | 0       | 0.01       | 0.01       | 0.04       | 0.04       | 0.06       | 0.29        |
|                           | %           | 100 (0)  | 100 (0) | 100 (0) | 99.9 (1.0) | 99.9 (1.0) | 99.2 (4.6) | 99.6 (2.3) | 99.1 (3.9) | 95.2 (10.0) |
| 20                        | $\hat{p}_m$ | 0        | 0       | 0       | 0.00       | 0.00       | 0.07       | 0.08       | 0.15       | 0.53        |
|                           | %           | 100 (0)  | 100 (0) | 100 (0) | 100 (0)    | 100 (0)    | 99.6 (2.3) | 99.6 (1.8) | 98.8 (4.2) | 93.7 (10.3) |
| 100                       | $\hat{p}_m$ | 0        | 0       | 0       | 0.02       | 0.06       | 0.30       | 0.17       | 0.42       | 0.91        |
|                           | %           | 100 (0)  | 100 (0) | 100 (0) | 99.9 (0.1) | 99.7 (1.6) | 97.3 (8.2) | 99.5 (1.6) | 98.0 (5.1) | 87.5 (14.3) |

**Table 27 Simulation study 2, with  $n_X = 30$ ,  $n_Y = 10$  and 100 runs. Evaluation of the second step of the ORdensity method with  $\alpha = 0.05$ . In the first column number of blocks. In column 2, the number of total simulated DE genes. In column 3, the  $10 \times f_0$  values where  $f_0$  is the average proportion of permuted cases in sets  $U_i$ . In column 4, the "\*" indicates the clusters considered by the procedure. Columns 5-8 contain for each cluster: the mean number of genes ( $\bar{n}_i$ ), the mean of OR values ( $\overline{OR}$ ), the mean of  $FP$  values ( $\overline{FP}$ ), the mean of  $dFP$  values ( $\overline{dFP}$ ). In the last column the mean of False Positive genes per cluster in % ( $\overline{FPC}$ ). Corresponding standard deviations are in brackets.**

| B | DE  | $10f_0$ | $C_i$   | $\bar{n}_i$ (sd) | $\overline{OR}$ (sd) | $\overline{FP}$ (sd) | $\overline{dFP}$ (sd) | $\overline{FPC}$ (sd) |
|---|-----|---------|---------|------------------|----------------------|----------------------|-----------------------|-----------------------|
| 1 | 5   | 9.1     | $C_1^*$ | 29.7 (32.1)      | 94.8 (61.2)          | 6.4 (1.2)            | 6.7 (8.7)             | 33.0 (44.3)           |
|   |     |         | $C_2$   | 88.1 (26.1)      | 10.7 (0.7)           | 9.1 (0.3)            | 18.2 (2.8)            | 100.0 (0.0)           |
|   |     |         | $C_3$   | 85.8 (19.0)      | 8.1 (0.3)            | 9.4 (0.3)            | 32.7 (1.8)            | 100.0 (0.0)           |
|   | 20  | 9.0     | $C_1^*$ | 20.0 (0.0)       | 127.9 (31.3)         | 0.0 (0.0)            | 0.0 (0.0)             | 0 (0)                 |
|   |     |         | $C_2$   | 100.7 (13.7)     | 11.0 (0.5)           | 9.0 (0.1)            | 16.9 (1.5)            | 100 (0)               |
|   |     |         | $C_3$   | 85.8 (19.0)      | 8.1 (0.3)            | 9.2 (0.1)            | 32.7 (1.8)            | 100 (0)               |
|   | 100 | 8.9     | $C_1^*$ | 100.0 (0.0)      | 120.0 (26.5)         | 0.0 (0.0)            | 0.0 (0.0)             | 0 (0)                 |
|   |     |         | $C_2$   | 84.5 (12.4)      | 11.0 (0.5)           | 9.1 (0.2)            | 16.5 (1.2)            | 100(0)                |
|   |     |         | $C_3$   | 77.0 (10.6)      | 8.1 (0.2)            | 9.2 (0.1)            | 30.3 (1.3)            | 100 (0)               |
| 2 | 10  | 9.1     | $C_1^*$ | 10.4 (8.5)       | 72.3 (19.9)          | 1.6 (1.2)            | 0.7 (2.3)             | 2.6 (0.1)             |
|   |     |         | $C_2$   | 103.8 (14.5)     | 11.2 (0.7)           | 9.0 (0.2)            | 16.7 (1.5)            | 99.9 (1.6)            |
|   |     |         | $C_3$   | 95.0 (14.6)      | 8.0 (0.2)            | 9.2 (0.1)            | 32.3 (1.2)            | 100.0 (0.0)           |
|   | 40  | 8.9     | $C_1^*$ | 39.7 (1.3)       | 65.5 (11.9)          | 0.1 (0.2)            | 0.1 (0.2)             | 0.1 (0.4)             |
|   |     |         | $C_2$   | 98.9 (12.0)      | 11.0 (0.5)           | 9.0 (0.2)            | 17.0 (1.2)            | 99.6 (1.2)            |
|   |     |         | $C_3$   | 88.0 (11.9)      | 8.0 (0.2)            | 9.2 (0.1)            | 32.3 (1.2)            | 100.0 (0.0)           |
|   | 200 | 8.6     | $C_1^*$ | 100.7 (21.8)     | 68.7 (17.6)          | 0.0 (0.0)            | 0.0 (0.0)             | 0.0 (0.0)             |
|   |     |         | $C_2^*$ | 102.5 (8.9)      | 42.5 (13.6)          | 0.6 (1.8)            | 1.0 (3.4)             | 4.2 (19.7)            |
|   |     |         | $C_3$   | 141.5 (19.2)     | 9.3 (0.4)            | 9.2 (0.1)            | 23.9 (1.6)            | 99.7 (0.9)            |
| 3 | 15  | 9.1     | $C_1^*$ | 13.5 (5.4)       | 52.0 (10.8)          | 1.4 (1.2)            | 0.7 (1.2)             | 1.9 (8.8)             |
|   |     |         | $C_2$   | 101.4 (14.6)     | 11.2 (0.6)           | 9.0(0.1)             | 16.9 (1.3)            | 97.9 (2.2)            |
|   |     |         | $C_3$   | 94.8 (13.8)      | 8.0 (0.2)            | 9.2 (0.2)            | 32.5 (1.1)            | 100.0 (0.1)           |
|   | 60  | 8.9     | $C_1^*$ | 55.4 (6.3)       | 47.8 (9.2)           | 0.5 (0.4)            | 0.4 (0.4)             | 0.3 (0.9)             |
|   |     |         | $C_2$   | 97.5 (13.8)      | 11.2 (0.7)           | 9.0 (0.2)            | 16.8 (1.3)            | 95.4 (5.7)            |
|   |     |         | $C_3$   | 87.4 (12.7)      | 7.8 (0.2)            | 9.2 (0.1)            | 32.3 (1.1)            | 99.8 (0.9)            |
|   | 300 | 8.3     | $C_1^*$ | 138.6 (31.9)     | 47.2 (11.9)          | 0.0 (0.1)            | 0.0 (0.1)             | 0.0 (0.0)             |
|   |     |         | $C_2^*$ | 156.8 (32.8)     | 27.3 (7.3)           | 0.8 (1.0)            | 1.2 (1.8)             | 1.2 (4.2)             |
|   |     |         | $C_3$   | 130.4 (12.8)     | 9.1 (0.3)            | 9.2 (0.2)            | 23.2 (1.0)            | 95.6 (6.0)            |



## FIGURES 8 – 20

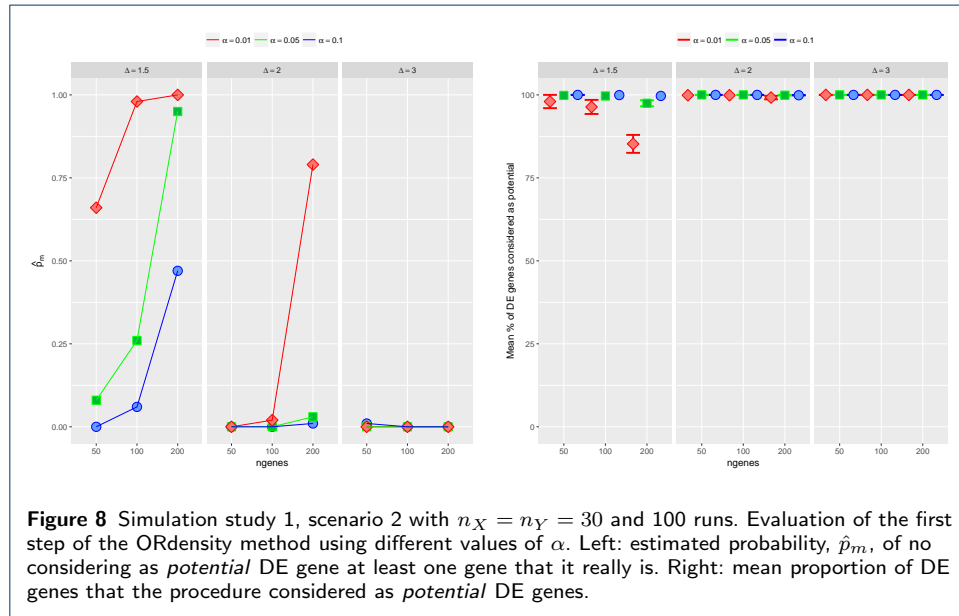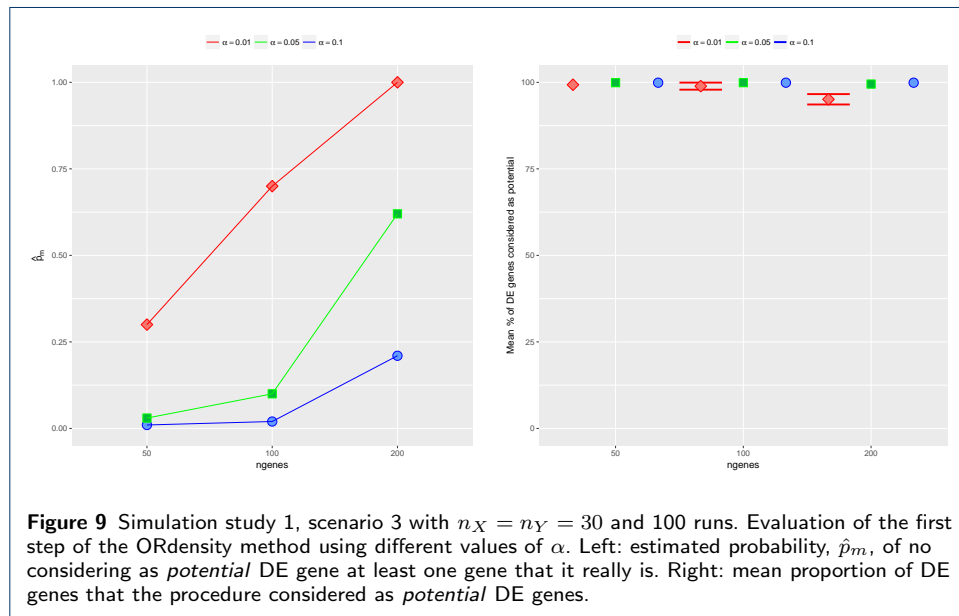

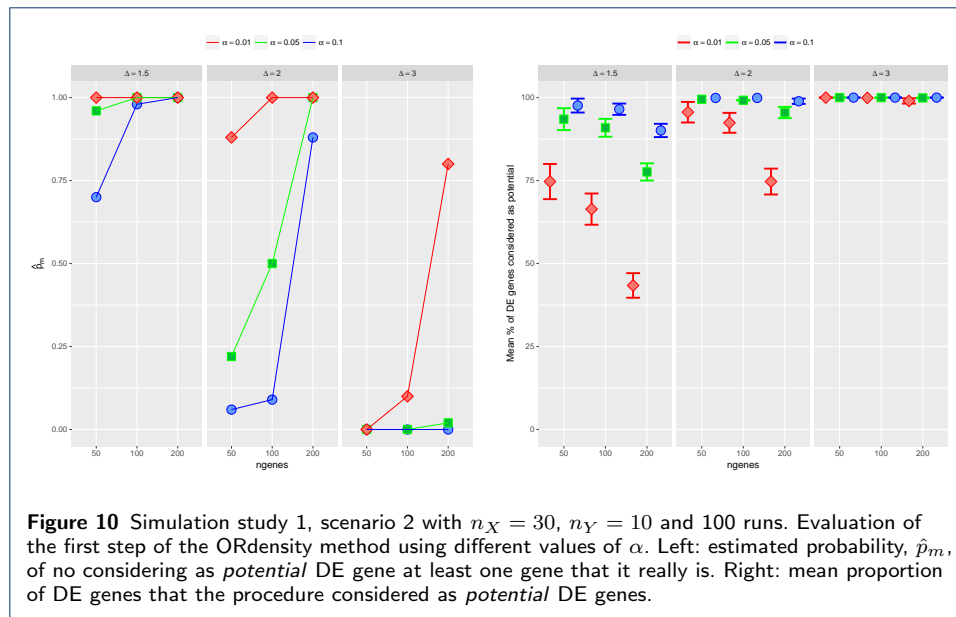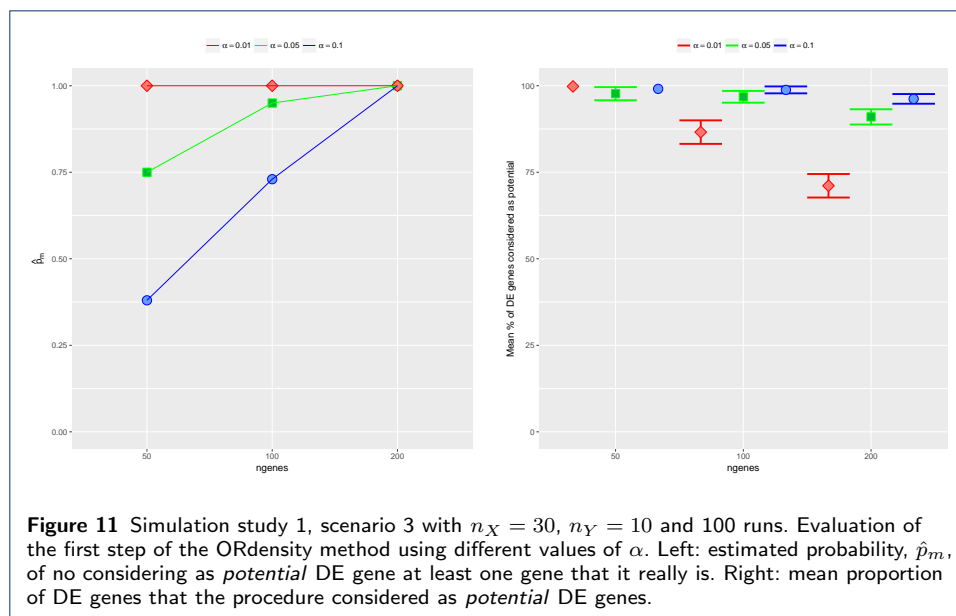

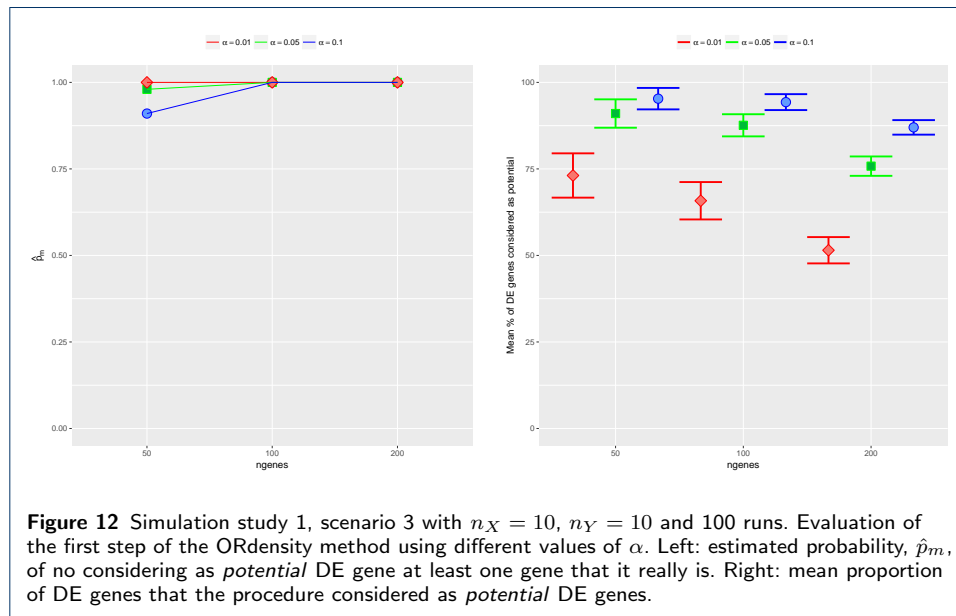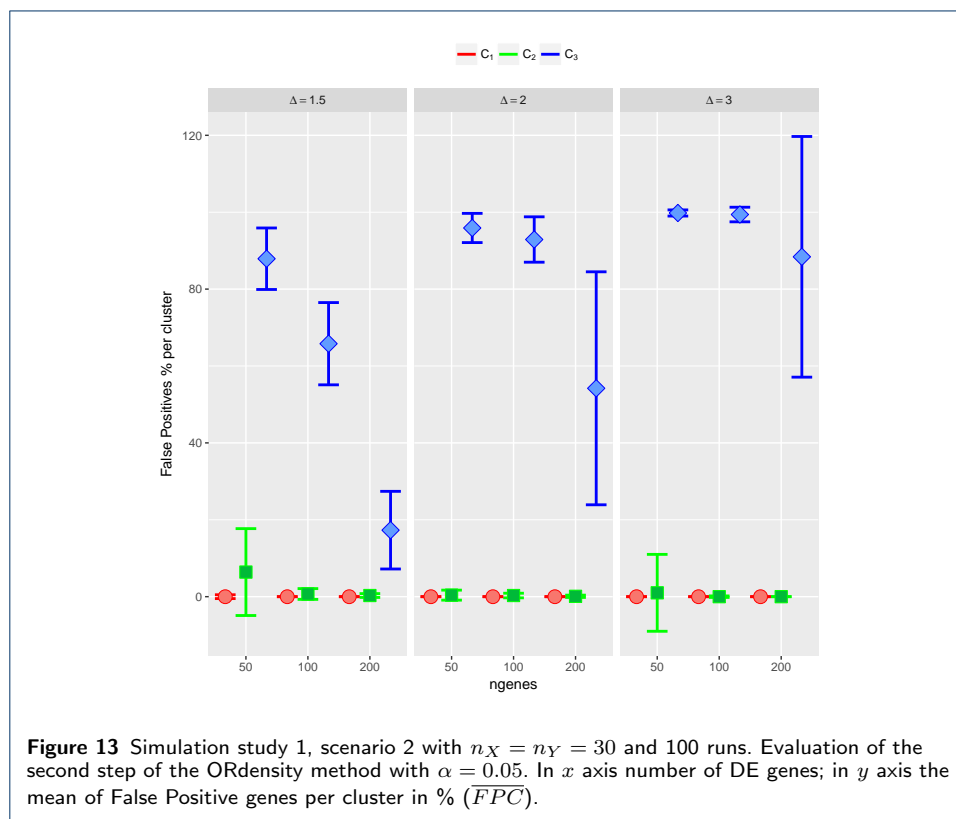

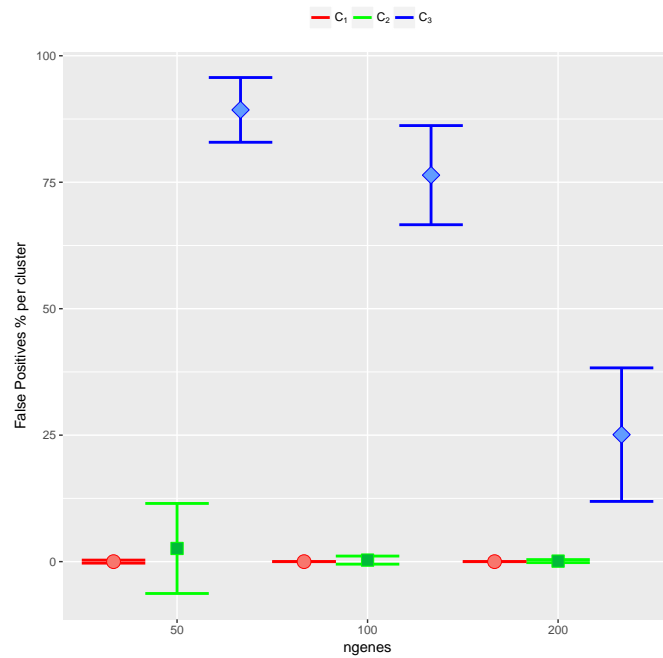

**Figure 14** Simulation study 1, scenario 3 with  $n_X = n_Y = 30$  and 100 runs. Evaluation of the second step of the ORdensity method with  $\alpha = 0.05$ . In  $x$  axis number of DE genes; in  $y$  axis the mean of False Positive genes per cluster in % ( $FPC$ ).

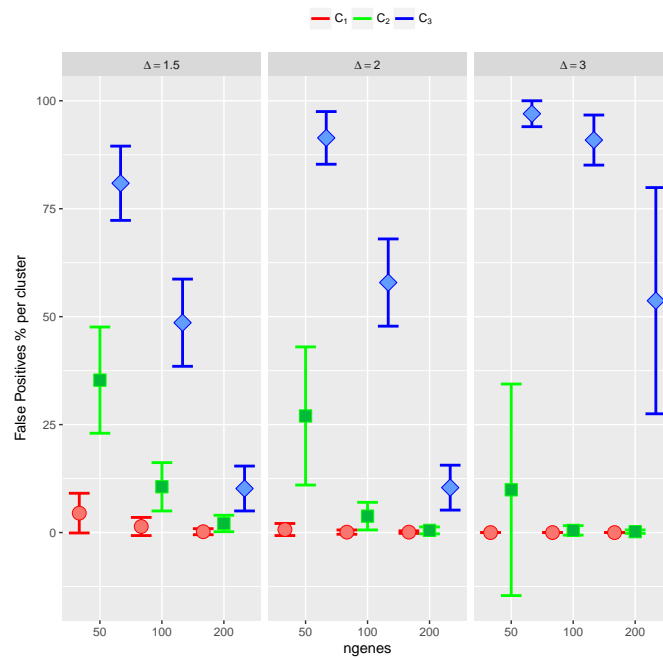

**Figure 15** Simulation study 1, scenario 1 with  $n_X = 30$ ,  $n_Y = 10$  and 100 runs. Evaluation of the second step of the ORdensity method with  $\alpha = 0.05$ . In  $x$  axis number of DE genes; in  $y$  axis the mean of False Positive genes per cluster in % ( $FPC$ ).

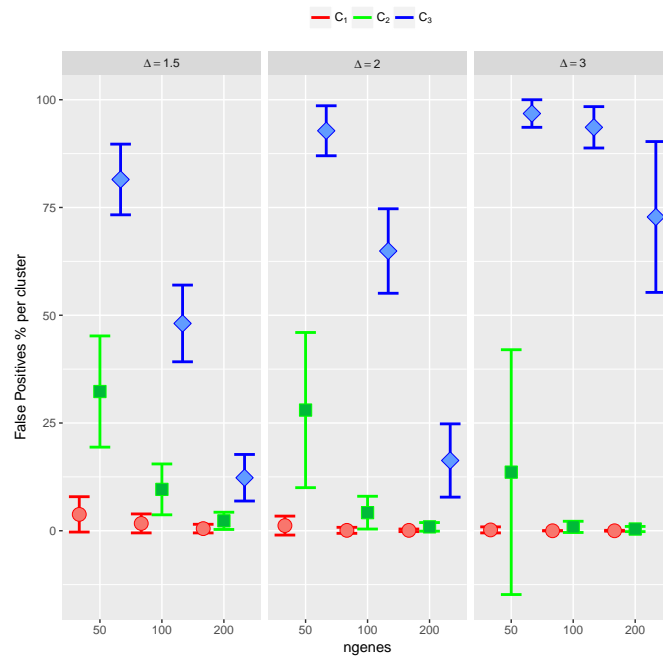

**Figure 16** Simulation study 1, scenario 2 with  $n_X = 30$ ,  $n_Y = 10$  and 100 runs. Evaluation of the second step of the ORdensity method with  $\alpha = 0.05$ . In  $x$  axis number of DE genes; in  $y$  axis the mean of False Positive genes per cluster in % ( $FPC$ ).

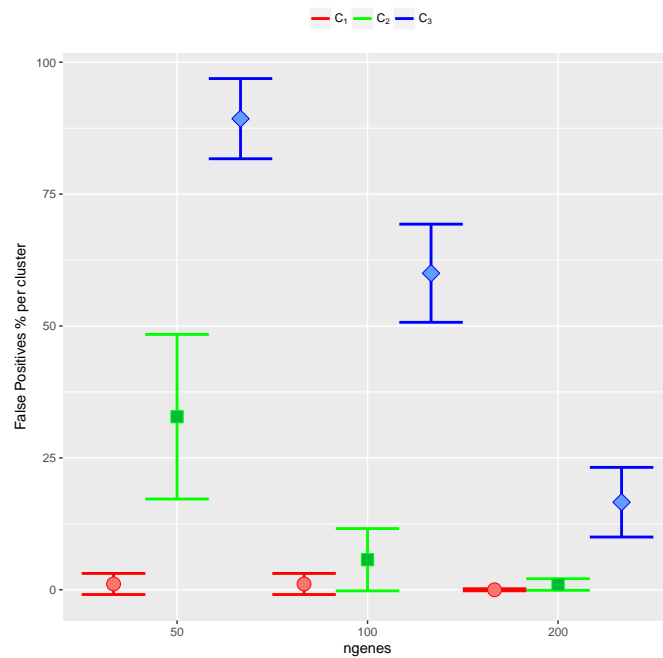

**Figure 17** Simulation study 1, scenario 3 with  $n_X = 30$ ,  $n_Y = 10$  and 100 runs. Evaluation of the second step of the ORdensity method with  $\alpha = 0.05$ . In  $x$  axis number of DE genes; in  $y$  axis the mean of False Positive genes per cluster in % ( $FPC$ ).

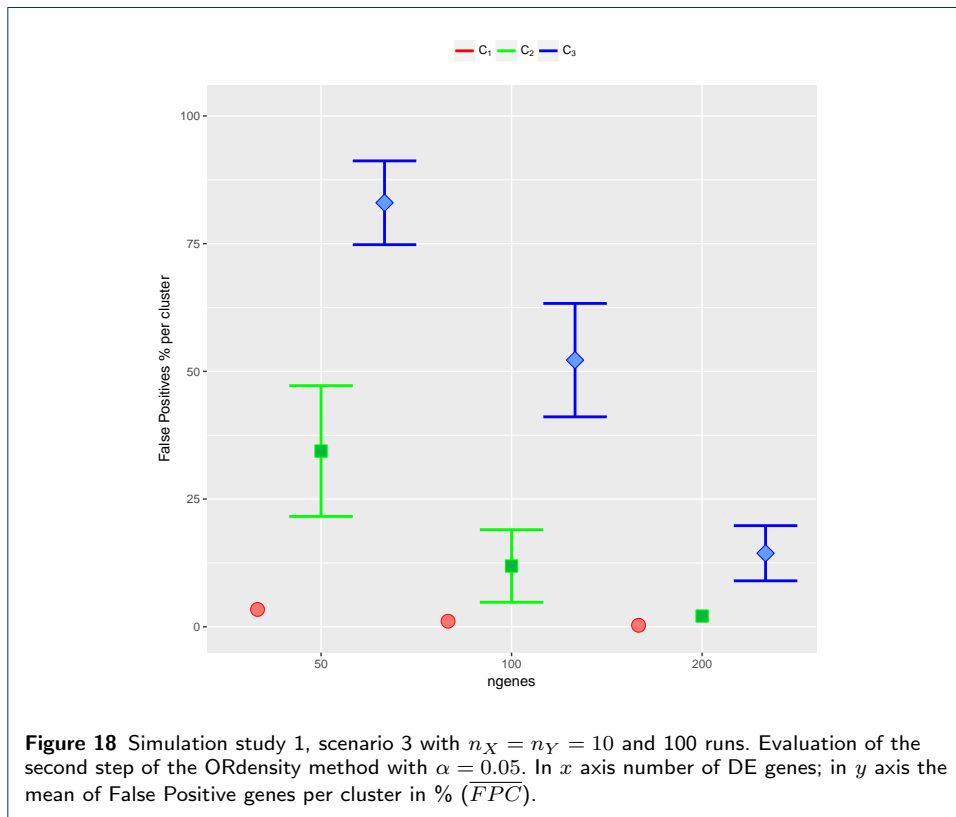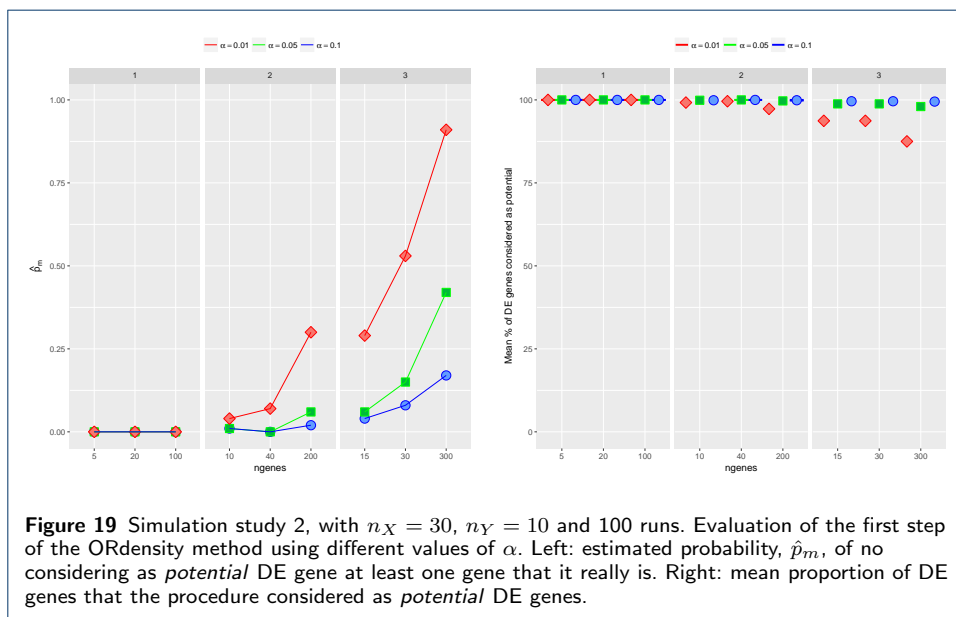

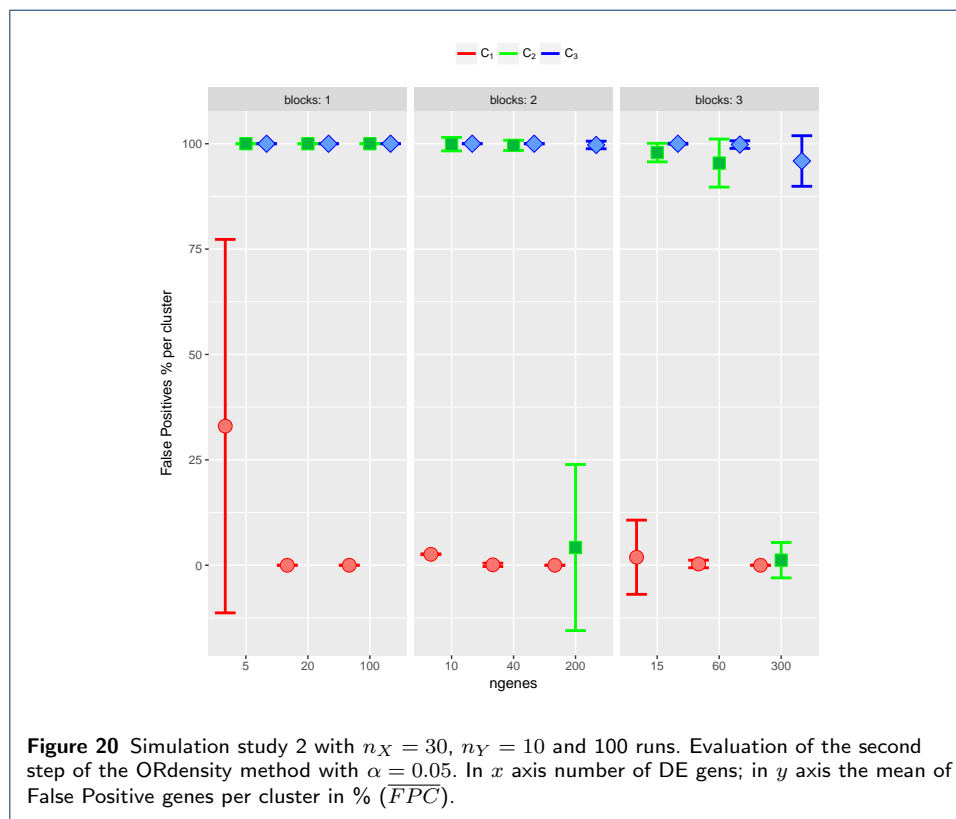

Supplement: 12859_2018_2318_MOESM1_ESM.pdf [file 12859_2018_2318_MOESM1_ESM.pdf]
